# Supplementary material
Source: Royal Society of Chemistry journal article supplement (doi:10.1039/d5fb00866b)
Supplement: d5fb00866b1.xlsx [file d5fb00866b1.xlsx]

## Sheet: Sheet1
Sample	Protein	Plasticiser	Plast	Plast_level	Sample_code	Thickness	Peak_force	Tensile_strength	Elongation_rupture	Elongation_break	Solubility	Moisture	Swelling_ratio	Seal_strength	WVTR	Opacity	L	a	b
6%API + 30%GLY	6	Glycerol	1	30	6AP30G	0.14	4.17	1.19	18.03	36.06	46.819	12.41	136.7	77.1503	22.51	2.52143	73.666	1.518	1.856
6%API + 30%GLY	6	Glycerol	1	30	6AP30G	0.14	4.39	1.25	16.43	32.86	46.946	12.44	137	76.6842	22.63	2.51064	73.548	1.523	1.879
6%API + 30%GLY	6	Glycerol	1	30	6AP30G	0.14	4.48	1.26	16.2	32.4	46.819	12.46	136.1	79.064	23.16	2.5	73.432	1.532	1.843
6%API + 30%GLY	6	Glycerol	1	30	6AP30G	0.15	4.58	1.25	15.88	31.76	46.861	12.44	136.6	78.676	22.77	2.51069	73.5487	1.52433	1.85933
7%API + 30%GLY	7	Glycerol	1	30	7AP30G	0.19	5.44	1.15	18.38	36.76	45.42	12.4	136.7	83.4121	22.19	2.52105	71.313	1.624	2.099
7%API + 30%GLY	7	Glycerol	1	30	7AP30G	0.18	5.8	1.29	17.11	34.22	45.328	12.77	136.9	81.828	22.11	2.53333	71.287	1.612	2.045
7%API + 30%GLY	7	Glycerol	1	30	7AP30G	0.18	5.87	1.3	17.39	34.78	45.0593	12.54	136.4	84.8931	22.21	2.52222	71.288	1.636	2.021
7%API + 30%GLY	7	Glycerol	1	30	7AP30G	0.17	5.67	1.33	17.69	35.38	45.2691	12.57	136.667	85.7202	22.17	2.52554	71.296	1.624	2.055
8%API + 30%GLY	8	Glycerol	1	30	8AP30G	0.23	7.14	1.26	19.5	39	44.6009	12.43	137.6	92.0585	21.37	2.53744	69.421	1.739	2.136
8%API + 30%GLY	8	Glycerol	1	30	8AP30G	0.21	7.47	1.42	20.05	40.1	45.3125	12.21	137.6	94.7719	21.07	2.52857	69.389	1.721	2.162
8%API + 30%GLY	8	Glycerol	1	30	8AP30G	0.2	7.2	1.44	20.3	40.6	45.3831	12.58	137.4	97.0369	21.49	2.52	69.367	1.711	2.121
8%API + 30%GLY	8	Glycerol	1	30	8AP30G	0.24	7.18	1.2	18.22	36.44	45.0988	12.4	137.533	93.9436	21.31	2.52867	69.3923	1.72367	2.13967
9%API + 30%GLY	9	Glycerol	1	30	9AP30G	0.28	9.63	1.4	21.86	43.72	44.9199	12.42	137.63	100.652	20.62	2.5471	69.276	1.761	2.291
9%API + 30%GLY	9	Glycerol	1	30	9AP30G	0.26	9.05	1.39	22.69	45.38	44.6429	12.5	138	101.706	20.64	2.54982	69.179	1.783	2.231
9%API + 30%GLY	9	Glycerol	1	30	9AP30G	0.28	9.35	1.33	23.02	46.04	45.0098	12.45	137	102.611	20.7	2.54612	69.169	1.778	2.267
9%API + 30%GLY	9	Glycerol	1	30	9AP30G	0.29	9.57	1.32	22.9	45.8	44.8575	12.46	137.543	105.602	20.65	2.54768	69.208	1.774	2.263
10%API + 30%GLY	10	Glycerol	1	30	10AP30G	0.3	10.9	1.45	23.36	46.72	44.7707	12.44	138	104.501	19.94	2.56811	69.184	1.823	2.722
10%API + 30%GLY	10	Glycerol	1	30	10AP30G	0.31	10.86	1.42	24.08	48.16	43.3663	12.08	138.8	105.745	20.08	2.5541	69.154	1.834	2.768
10%API + 30%GLY	10	Glycerol	1	30	10AP30G	0.29	10.2	1.39	23.04	46.08	45.614	12.9	138.4	103.108	20.16	2.56106	68.989	1.812	2.691
10%API + 30%GLY	10	Glycerol	1	30	10AP30G	0.27	10.61	1.57	24.48	48.96	44.5837	12.47	138.4	106.724	20.06	2.56109	69.109	1.823	2.727
6%API + 50%GLY	6	Glycerol	1	50	6AP50G	0.17	3.92	0.92	40.33	80.66	44.885	13.67	132.2	55.0105	25.41	2.28235	72.275	1.618	2.184
6%API + 50%GLY	6	Glycerol	1	50	6AP50G	0.16	3.25	0.81	41.76	83.52	44.4554	13.65	132.1	52.4108	24.8	2.28125	72.263	1.623	2.188
6%API + 50%GLY	6	Glycerol	1	50	6AP50G	0.17	3.5	0.82	41.65	83.3	44.3898	13.63	132	52.2599	24.08	2.27647	72.256	1.632	2.179
6%API + 50%GLY	6	Glycerol	1	50	6AP50G	0.18	3.54	0.79	49.99	99.98	44.5767	13.65	132.1	54.646	24.76	2.28003	72.2647	1.62433	2.18367
7%API + 50%GLY	7	Glycerol	1	50	7AP50G	0.2	4.05	0.81	43.99	87.98	44.281	13.61	133.7	56.9909	21.95	2.29	72.649	1.724	2.214
7%API + 50%GLY	7	Glycerol	1	50	7AP50G	0.18	4.16	0.92	41.05	82.1	44.0945	13.64	133.5	55.4609	21.99	2.275	72.476	1.712	2.228
7%API + 50%GLY	7	Glycerol	1	50	7AP50G	0.18	4.28	0.95	43.4	86.8	44.0476	13.63	132.8	58.1418	22.15	2.27	72.704	1.736	2.241
7%API + 50%GLY	7	Glycerol	1	50	7AP50G	0.2	4.48	0.9	41.05	82.1	44.1411	13.62	133.333	59.4484	22.03	2.27833	72.6097	1.724	2.22767
8%API + 50%GLY	8	Glycerol	1	50	8AP50G	0.23	4.92	0.85	43.09	86.18	44.2568	13.65	134.6	64.2739	20	2.31169	71.988	1.839	2.291
8%API + 50%GLY	8	Glycerol	1	50	8AP50G	0.24	5.25	0.88	45.99	91.98	43.8976	13.32	134	65.9901	19.62	2.30252	71.879	1.821	2.291
8%API + 50%GLY	8	Glycerol	1	50	8AP50G	0.22	5.52	1	45.84	91.68	44.1352	13.55	133.3	65.9403	19.12	2.2987	71.868	1.811	2.281
8%API + 50%GLY	8	Glycerol	1	50	8AP50G	0.22	5.47	0.99	44.89	89.78	44.0965	13.51	133.967	67.2405	19.58	2.3043	71.9117	1.82367	2.28767
9%API + 50%GLY	9	Glycerol	1	50	9AP50G	0.29	7.03	0.98	46.89	93.78	43.4673	13.65	134	73.8218	19.8	2.33217	71.814	1.861	2.383
9%API + 50%GLY	9	Glycerol	1	50	9AP50G	0.3	6.79	0.92	46.81	93.62	43.34	13.23	134.5	71.8344	19.78	2.30405	71.789	1.883	2.367
9%API + 50%GLY	9	Glycerol	1	50	9AP50G	0.29	6.75	0.93	43.61	87.22	44.8413	13.11	134.2	74.1707	19.88	2.31271	71.834	1.878	2.386
9%API + 50%GLY	9	Glycerol	1	50	9AP50G	0.29	6.59	0.9	44.64	89.28	43.8829	13.33	134.233	70.3021	19.82	2.31631	71.8123	1.874	2.37867
10%API + 50%GLY	10	Glycerol	1	50	10AP50G	0.32	7.83	0.98	49.8	99.6	41.8437	13.65	135.1	78.0045	17.17	2.33645	71.784	1.923	2.504
10%API + 50%GLY	10	Glycerol	1	50	10AP50G	0.3	7.59	1	45.64	91.28	45.1172	13.49	134.3	80.5607	17.15	2.34675	71.823	1.934	2.512
10%API + 50%GLY	10	Glycerol	1	50	10AP50G	0.31	7.68	1	49.99	99.98	44.3787	12.72	134.1	78.8739	17.16	2.33027	71.856	1.912	2.412
10%API + 50%GLY	10	Glycerol	1	50	10AP50G	0.32	7	0.87	48.08	96.16	43.7798	13.29	134.5	80.529	17.16	2.33782	71.821	1.923	2.476
6%API + 60%Sorb	6	Sorbitol	2	60	6AP60S	0.18	16.76	3.83	1.34	2.68	58.1854	8.88	177.2	114.122	15.56	2.58	72.074	1.418	1.956
6%API + 60%Sorb	6	Sorbitol	2	60	6AP60S	0.16	8.57	2.12	2.34	4.68	58.1349	8.83	177.1	110.48	15.36	2.6	72.341	1.423	1.979
6%API + 60%Sorb	6	Sorbitol	2	60	6AP60S	0.17	7.2	1.71	2.41	4.82	58.498	8.81	177.1	112.56	15.56	2.58	72.218	1.432	1.943
6%API + 60%Sorb	6	Sorbitol	2	60	6AP60S	0.17	11.32	2.66	2.17	4.34	58.2728	8.84	177.133	115.151	15.49	2.58832	72.211	1.42433	1.95933
7%API + 60%Sorb	7	Sorbitol	2	60	7AP60S	0.18	13.51	2.97	2.95	5.9	57.7778	8.9	177.8	112.442	14.29	2.59	70.87	1.524	2.199
7%API + 60%Sorb	7	Sorbitol	2	60	7AP60S	0.19	13	2.72	2.86	5.72	57.9568	8.82	177.6	115.194	14.27	2.6	70.771	1.512	2.145
7%API + 60%Sorb	7	Sorbitol	2	60	7AP60S	0.18	13.32	2.91	2.91	5.82	58.317	8.86	176.1	113.715	14.35	2.58	70.671	1.536	2.011
7%API + 60%Sorb	7	Sorbitol	2	60	7AP60S	0.19	13.61	2.91	2.82	5.64	58.0172	8.86	177.167	114.491	14.3	2.59	70.7707	1.524	2.11833
8%API + 60%Sorb	8	Sorbitol	2	60	8AP60S	0.22	17.34	3.09	3.85	7.7	57.8788	8.88	176.7	116.301	13.47	2.61	70.218	1.639	2.236
8%API + 60%Sorb	8	Sorbitol	2	60	8AP60S	0.24	16.62	2.83	4.33	8.66	58.3497	8.53	177.8	118.195	13.25	2.6	70.289	1.621	2.262
8%API + 60%Sorb	8	Sorbitol	2	60	8AP60S	0.23	15.91	2.77	3.78	7.56	57.485	8.32	178.2	119.387	13.39	2.61	70.118	1.611	2.221
8%API + 60%Sorb	8	Sorbitol	2	60	8AP60S	0.22	16.58	3.01	3.71	7.42	57.9045	8.58	177.567	120.159	13.37	2.61	70.2083	1.62367	2.23967
9%API + 60%Sorb	9	Sorbitol	2	60	9AP60S	0.25	18.6	3.04	4.61	9.22	56.8682	8.87	177.4	123.639	11.78	2.62	70.189	1.661	2.391
9%API + 60%Sorb	9	Sorbitol	2	60	9AP60S	0.23	19.56	3.36	4.55	9.1	58.0392	8.84	178	126.837	11.7	2.62	70.167	1.683	2.331
9%API + 60%Sorb	9	Sorbitol	2	60	9AP60S	0.26	19.33	3.03	5.33	10.66	58.2031	8.37	177.8	125.646	11.9	2.6	70.161	1.678	2.367
9%API + 60%Sorb	9	Sorbitol	2	60	9AP60S	0.25	18.77	3.06	4.9	9.8	57.7035	8.69	177.733	125.217	11.79	2.61	70.1723	1.674	2.363
10%API + 60%Sorb	10	Sorbitol	2	60	10AP60S	0.34	31.28	3.67	5.26	10.52	57.2773	8.84	178.1	131.741	10.35	2.64	70.148	1.723	2.822
10%API + 60%Sorb	10	Sorbitol	2	60	10AP60S	0.26	20.64	3.13	5	10	57.0577	8.22	178.5	132.976	10.54	2.63	70.121	1.734	2.868
10%API + 60%Sorb	10	Sorbitol	2	60	10AP60S	0.28	22.24	3.13	5.39	10.78	58.5127	9	178.5	127.993	10.54	2.62	70.118	1.712	2.891
10%API + 60%Sorb	10	Sorbitol	2	60	10AP60S	0.27	25.24	3.81	5.12	10.24	57.6159	8.69	178.367	130.742	10.48	2.63	70.129	1.723	2.86033
6%API + 70%Sorb	6	Sorbitol	2	70	6AP70S	0.18	10.61	2.38	9.32	18.64	55.5883	9.06	174.7	101.562	18.11	2.37079	71.659	1.518	2.284
6%API + 70%Sorb	6	Sorbitol	2	70	6AP70S	0.18	9.96	2.25	11.74	23.48	55.1383	9.03	174.7	103.273	17.83	2.38983	71.598	1.523	2.268
6%API + 70%Sorb	6	Sorbitol	2	70	6AP70S	0.17	12.31	2.9	11.19	22.38	55.7957	9.26	174.8	104.833	17.65	2.37143	71.641	1.532	2.269
6%API + 70%Sorb	6	Sorbitol	2	70	6AP70S	0.17	10.81	2.57	10.24	20.48	55.5074	9.12	174.733	105.195	17.86	2.37735	71.6327	1.52433	2.27367
7%API + 70%Sorb	7	Sorbitol	2	70	7AP70S	0.2	13	2.63	12.76	25.52	54.8023	9.09	174.2	105.739	17.03	2.38889	71.406	1.624	2.234
7%API + 70%Sorb	7	Sorbitol	2	70	7AP70S	0.19	12.78	2.72	10.24	20.48	54.0434	8.9	175.3	107.181	16.95	2.39394	71.389	1.612	2.238
7%API + 70%Sorb	7	Sorbitol	2	70	7AP70S	0.2	12.87	2.6	10.08	20.16	54.2574	9.08	175.2	109.141	17.03	2.40404	71.413	1.636	2.231
7%API + 70%Sorb	7	Sorbitol	2	70	7AP70S	0.2	12.97	2.65	13.12	26.24	54.3677	9.02	174.9	106.444	17	2.39562	71.4027	1.624	2.23433
8%API + 70%Sorb	8	Sorbitol	2	70	8AP70S	0.23	15.71	2.7	13.36	26.72	53.3285	9.07	175.6	113.065	15.92	2.41631	71.351	1.739	2.391
8%API + 70%Sorb	8	Sorbitol	2	70	8AP70S	0.24	16.49	2.75	10.41	20.82	54.4922	9.18	175.5	110.451	15.52	2.39167	71.371	1.721	2.391
8%API + 70%Sorb	8	Sorbitol	2	70	8AP70S	0.23	16.39	2.85	11.24	22.48	54.4204	9.15	174.5	111.509	15.88	2.43913	71.347	1.711	2.381
8%API + 70%Sorb	8	Sorbitol	2	70	8AP70S	0.23	16.45	2.86	12.78	25.56	54.0804	9.13	175.2	112.254	15.77	2.4157	71.3563	1.72367	2.38767
9%API + 70%Sorb	9	Sorbitol	2	70	9AP70S	0.27	18.94	2.83	11.04	22.08	52.2285	9.04	175	117.377	13.13	2.43657	71.045	1.761	2.483
9%API + 70%Sorb	9	Sorbitol	2	70	9AP70S	0.28	19.25	2.79	13.23	26.46	54.4747	9.64	175.6	119.455	13.53	2.42391	71.078	1.783	2.467
9%API + 70%Sorb	9	Sorbitol	2	70	9AP70S	0.26	19.19	2.95	13.76	27.52	55.0098	9.62	175.6	119.739	13.33	2.44231	71.089	1.778	2.486
9%API + 70%Sorb	9	Sorbitol	2	70	9AP70S	0.28	19.1	2.75	13.68	27.36	53.9043	9.43	175.4	116.589	13.33	2.43426	71.0707	1.774	2.47867
10%API + 70%Sorb	10	Sorbitol	2	70	10AP70S	0.32	23.62	2.97	14.85	29.7	52.2365	9.01	176.7	124.834	10.92	2.46541	70.679	1.823	2.604
10%API + 70%Sorb	10	Sorbitol	2	70	10AP70S	0.31	23.87	3.07	16.04	32.08	54.1667	9.6	176.1	120.456	10.94	2.48113	70.661	1.834	2.612
10%API + 70%Sorb	10	Sorbitol	2	70	10AP70S	0.33	24.46	2.99	15.85	31.7	54.672	9.88	176.1	123.615	10.88	2.47319	70.653	1.812	2.612
10%API + 70%Sorb	10	Sorbitol	2	70	10AP70S	0.3	24.47	3.25	17.36	34.72	53.6917	9.49	176.3	124.05	10.91	2.47324	70.6643	1.823	2.676
